# Supplementary material for: An Analytical Approach for Estimating Fossil Record and Diversification Events in Sharks, Skates and Rays
Source: PLoS One. 2012 Sep 5;7(9):e44632. doi: 10.1371/journal.pone.0044632 (PMC3434181; doi:10.1371/journal.pone.0044632)
Supplement: Table S2 — Correlation table using the Spearman rank correlation coefficient and corresponding p-values. Values in bold indicate statistically significant correlations. O = Order; F = Family; G = Genus. (XLS) [file pone.0044632.s003.xls]

## Sheet: Feuil1
Table S2. Correlation table using the Spearman rank correlation coefficient
		Correlation	P-value
	RCI-G vs RCI'-G	0.9642857	0.002778
	RCI-F vs RCI'-F	0.0360375	0.9389
	RCI-O vs RCI'-O	0	1
	RCI-G vs RCI-F	0.1982062	0.6701
	RCI-G vs RCI-O	0.5	0.2667
	RCI-F vs RCI-O	0.8288625	0.02117
	RCI'-G vs RCI'-F	-0.75	0.06627
	RCI'-G vs RCI'-O	-0.6071429	0.1667
	RCI'-F vs RCI'-O	0.8571429	0.02381
	RCI-G vs NodesG	0.4303767	0.3351
	RCI'-G vs NodesG	0.5052248	0.2474
	RCI-F vs NodesF	0.1926687	0.679
	RCI'-F vs NodesF	-0.8728716	0.01032
	RCI-O vs NodesO	0.755929	0.04931
	RCI'-O vs NodesO	-0.3779645	0.4032
